# Supplementary material
Source: publisher site journal article supplement (https://static.cambridge.org/content/id/urn:cambridge.org:id:article:S0007114519002757/resource/name/S0007114519002757supp002.docx)
Supplement: Supplementary file 1 [file S0007114519002757supp002.docx]

Supplementary Table 1. Pyrosequencing Assays

| **AdipoR1** | |
| --- | --- |
| **Number of CpG sites** | 3 |
| **Sequence to Analyze** | TYGGTYGGGAAGTTGATGGAGATTYGA |
| **Nucleotide dispensation order** | ATCGTCGAGATGAGTGAGATCG |
| **LEPROT** | |
| **Number of CpG sites** | 7 |
| **Sequence to Analyze** | YGTTAGGGGGYGGGTYGGGTTTTGGATTYGYGYGTYGGT |
| **Nucleotide dispensation order** | GTCGCTCATGGTCGTCGTTGAGTCGTCGTCGTCG |
